# Supplementary material
Source: publisher site journal article supplement (https://www.dovepress.com/article/258353)

**Supplementary Information**

**Title:** The Association Between Eosinophil Variability Patterns and the Efficacy of Inhaled Corticosteroids in Stable COPD Patients

**Figure S1. Distribution of Baseline Post-bronchodilator FEV1**

**
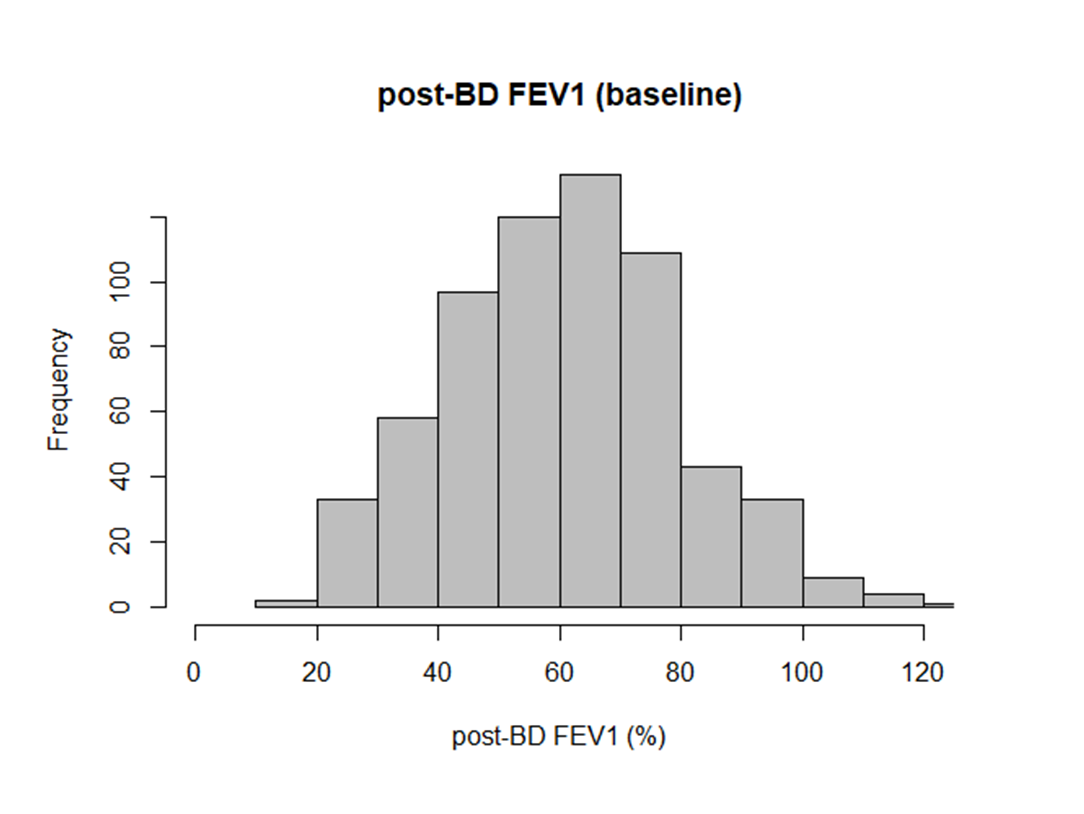
**

**Figure S2. Forrest Plots with Different Cut-off values of Serum Eosinophil**


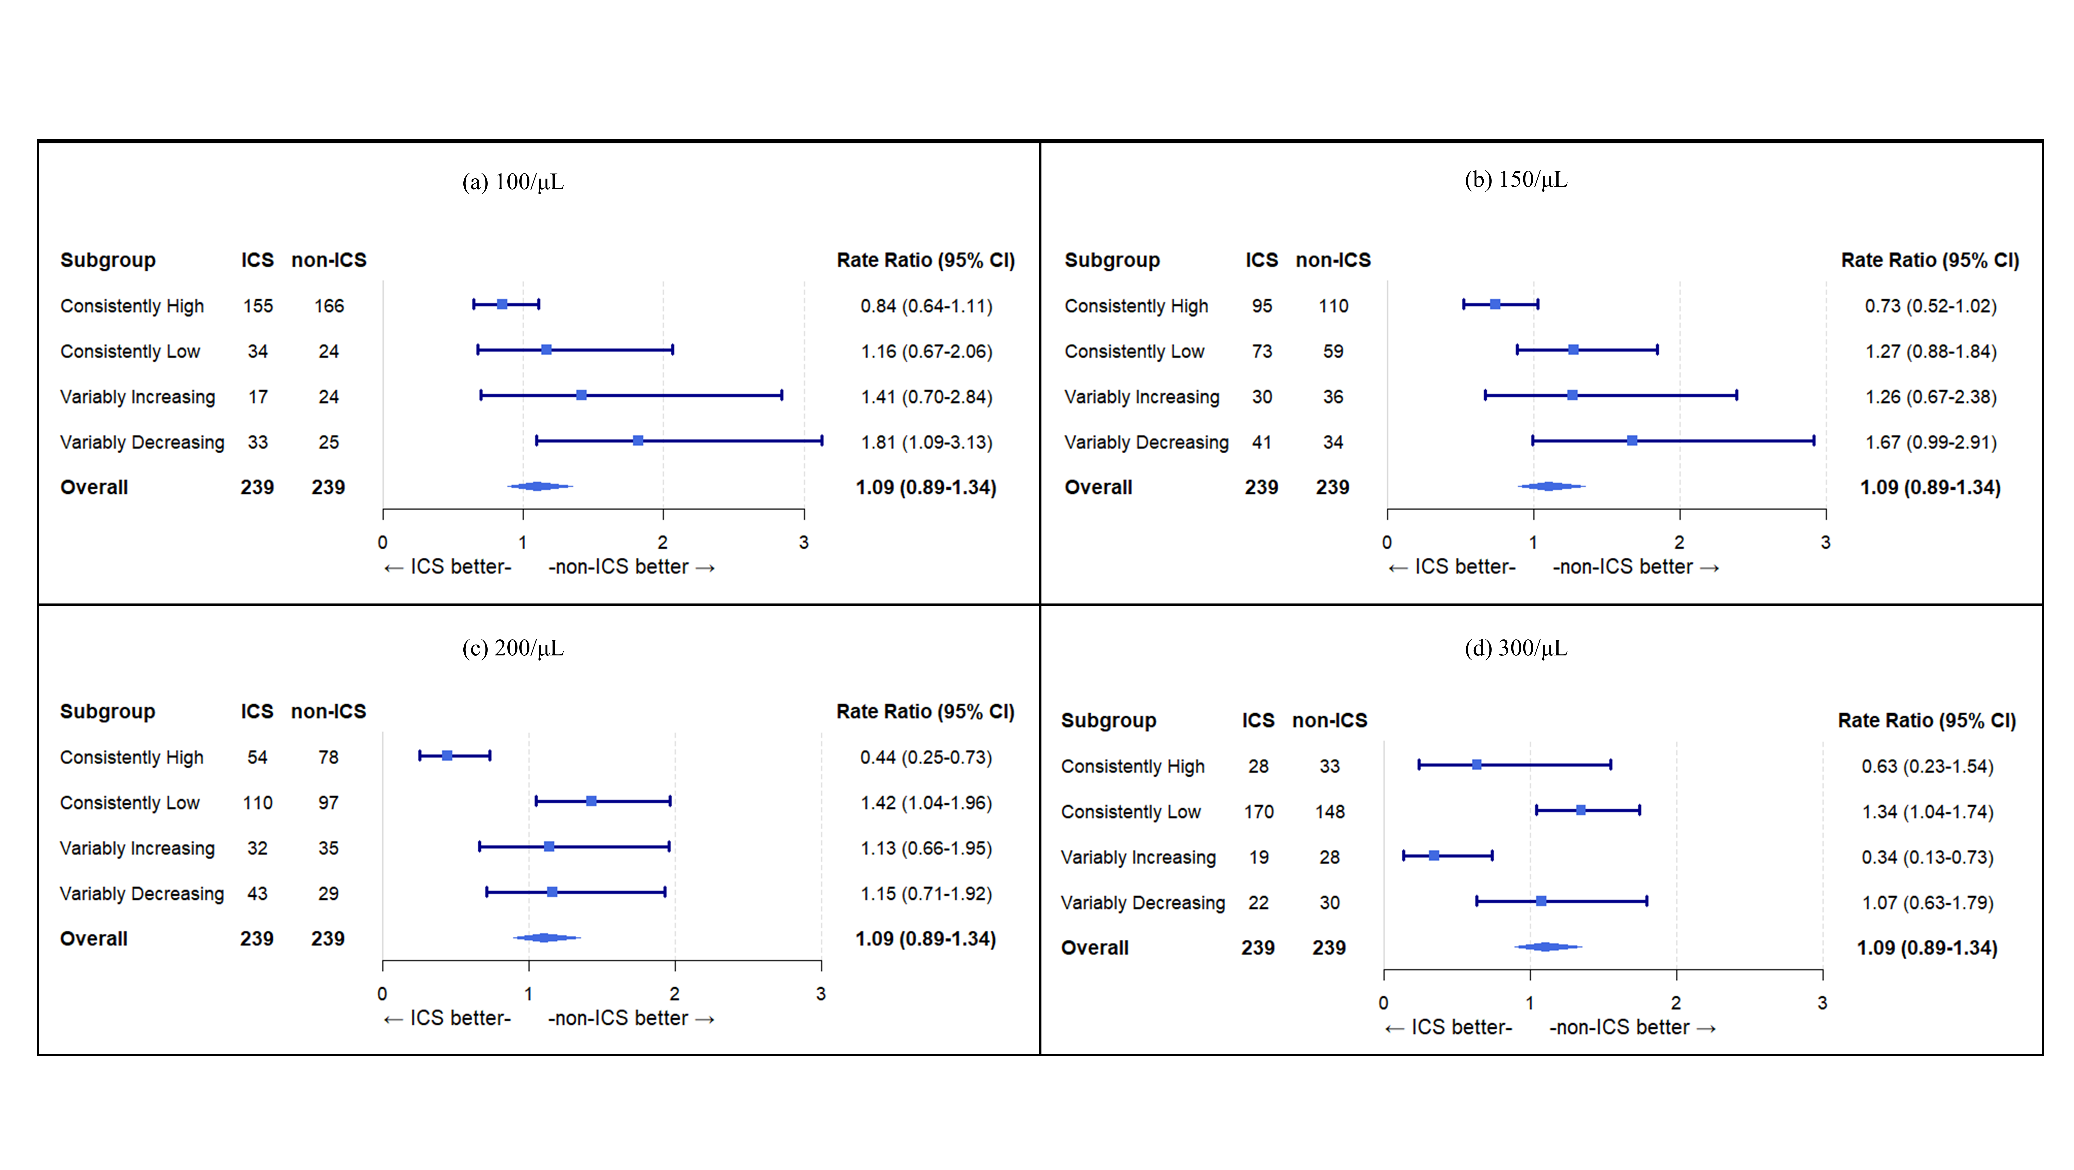

Supplement: Supplementary file 1 [file get_supplementary_file.php]
